# Supplementary material for: An all-graphdiyne electrochemiluminescence biosensor for the ultrasensitive detection of microRNA-21 based on target recycling with DNA cascade reaction for signal amplification
Source: Royal Society of Chemistry journal article supplement (doi:10.1039/d3an00146f), 2023-01-01
Supplement: d3an00146f1.pdf [file d3an00146f1.pdf]

## Supporting Information

### **An All-Graphdiyne Electrochemiluminescence Biosensor for Ultrasensitive Detection of MicroRNA-21 Based on Target Recycling with DNA Cascade Reaction for Signal Amplification**

Yu Lin<sup>a,b</sup>, Jiawen Wu<sup>a</sup>, Yeyu Wu<sup>a</sup>, Rongxian Ma<sup>a</sup>, Yuyi Zhou<sup>a</sup>, Jinyue  
Shi<sup>a</sup>, Mingxiang Li<sup>a</sup>, Xuecai Tan<sup>\*a</sup>, Kejing Huang<sup>\*a</sup>

*a. School of Chemistry and Chemical Engineering, Guangxi Minzu University; Key Laboratory of Chemistry and Engineering of Forest Products, State Ethnic Affairs Commission; Guangxi Key Laboratory of Chemistry and Engineering of Forest Products; Guangxi Collaborative Innovation Center for Chemistry and Engineering of Forest Products; Key Laboratory of Applied Analytical Chemistry (Guangxi Minzu University), Education Department of Guangxi Zhuang Autonomous Region. Nanning 530006, China*

*b. Faculty of Pharmacy, Guangxi University of Chinese Medicine, Nanning 530001, China*

\* To whom correspondence should be addressed.

\* E-mail: gxunxctan@126.com

\* E-mail: kejinghuang@163.com

## Contents

|                                                                        |          |
|------------------------------------------------------------------------|----------|
| <b>1. Materials, reagents and Apparatus</b>                            | Page S3  |
| <b>2. Preparation of AuNPs/GDY</b>                                     | Page S4  |
| <b>3. Preparation of GDYO QDs</b>                                      | Page S5  |
| <b>4. XPS analysis of AuNPs/GDY.</b>                                   | Page S6  |
| <b>5. Figure S2. Effects of reaction time in 3D DNA walker and HCR</b> | Page S7  |
| <b>6. Table S1. Sequences of the oligonucleotides</b>                  | Page S8  |
| <b>7. Table S2. Comparison of various sensors for miRNA detection</b>  | Page S9  |
| <b>8. Table S3. Sample recovery experiment</b>                         | Page S10 |
| <b>9. References</b>                                                   | Page S11 |

## **Materials and reagents**

Graphdiyne (GDY) was purchased from Jiangsu Xianfeng Nanomaterials Technology Co., Ltd. (Nanjing, China). N-hydroxysuccinimide (NHS, 98%), 1-ethyl-(3-dimethylaminopropyl) carbon diimine hydrochloride (EDC, 98%), 6-mercapto-1-hexanol (MCH), Tris (2-carboxyethyl) phosphine (TCEP), diethyl pyrocarbate (DEPC),  $\text{HAuCl}_4 \cdot 3\text{H}_2\text{O}$ ,  $\text{NaBH}_4$  were purchased from Aladdin Reagent Co. Ltd. (Shanghai, China). The oligonucleotides were obtained from Sangon Biotechnology Inc. (Shanghai, China), as shown in Table S1. Phosphate buffered saline (PBS) at pH 7.4 was used to wash the electrode and prepare aptamer solutions. All the reagents were analytical grade unless otherwise stated. The serum samples provided by the Ruikang Hospital Affiliated to Guangxi University of Chinese Medicine were used for real sample analysis.

## **Apparatus**

ECL was measured on an MPI-EII multi-parameter electrochemiluminescence system (Xi'an Remax Electronic Science & Technology Co. Ltd, China). The Electrochemical workstation CHI440 (Shanghai Chenhua Instrument Co., Ltd., China) was used to perform the cyclic voltammetry (CV) detection. Electrochemical impedance spectroscopy (EIS) was performed by the PGSTAT128N Autolab potentiostat/galvanostat (The Netherlands). Scanning electron microscopy (SEM) was tested by SUPPRA 55 Sapphire (Carl Zeiss, Germany), transmission electron microscopy (TEM) was tested by Tecnai F30 (FEI, USA), which were used to characterize the morphology of the materials. D8 ADVANCE X-ray powder

diffractometer (AXS, Germany), Nicolet iS10 Fourier transform infrared spectrometer (Thermo Fisher Scientific, USA), UV-2100 UV-vis spectrophotometer (Beijing Beifen Ruili Co., LTD, China) and FL-4600 fluorescence spectrometer (Hitachi, Japan) were utilized to characterize the experimental materials, respectively. Deionized water was taken from Milli-Q water purification system (Millipore, USA).

ECL, CV and EIS detection were performed in the three-electrode system, the working electrode was modified glassy carbon electrode (GCE), the counter electrode was platinum pole, and the reference electrode was Ag/AgCl (sat. KCl) electrode or saturated calomel electrode (SCE). The scanning ranges of ECL potential detection and CV detection were -1.8~0 V and -0.2~0.6 V, respectively. The scan rates of ECL detection was 200 mV/s, and the scan rates of CV detection was 100 mV/s.

### **Preparation of AuNPs/GDY**

The preparation of AuNPs/GDY was slightly adjusted according to the literature method<sup>[1-2]</sup>. Firstly, 2 mg of GDY was dispersed in 4 mL of ultrapure water and sonicated for 30 min. Secondly, 0.05 mol/L HAuCl<sub>4</sub>·3H<sub>2</sub>O solution was added to the GDY dispersion under stirring conditions. The mixture was sonicated for 10 min at room temperature and then stirred for 1 h, which was repeated 3 times. Subsequently, the newly prepared 0.05 mol/L NaBH<sub>4</sub> solution was quickly added to the above solution and stirred for 20 min. Then, 0.02 mol/L sodium citrate solution was added dropwise and stirred for 30 min. To remove unreacted substances, the reaction solution was centrifuged, washed three times with ultrapure water, and dried under vacuum at 60°C. Finally, the obtained precipitate was redispersed in 4 mL of

ultrapure water to obtain AuNPs/GDY, which was stored at 4 °C.

### **Preparation of GDYO QDs**

GDYO was synthesized by acid-oxidation treatment according to the literature<sup>[3-4]</sup>. Firstly, 10 mg of GDY powder was mixed with 1 mL of concentrated HNO<sub>3</sub>, 3 mL of concentrated H<sub>2</sub>SO<sub>4</sub> and 10 mg of KMnO<sub>4</sub> powder. Then, the mixture was stirred in an oil bath at 80 °C for 24 h. Secondly, after the mixture was cooled to room temperature, the pH was adjusted to 8.0 with NaOH in an ice bath. Afterwards, The suspension was centrifuged at 8000 rpm for 10 minutes and washed several times. To obtain the pure GDYO, the centrifuged product was dialyzed (cutoff, 3500) in aqueous solution for 3 days. The GDYO aqueous suspension was sonicated for 24 hours and heated in an oil bath at 100°C for 6 hours. After the mixed product was centrifuged, the supernatant was taken to obtain 0.8 mg/mL GDYO QDs.

The full-scan spectra of X-ray photoelectron spectroscopy (XPS) in Fig. S1A was mainly a to probe the elemental composition of AuNPs/GDY. In the C 1s XPS spectrum (Fig. S1B), the peaks at 284.8, 285.6, 286.9, and 288.6 eV can be assigned to carbon in the form of C=C (sp<sup>2</sup>), C≡C (sp), C-O, C=O, respectively. As is shown in the Fig. S1C, the O 1s can be respectively divided into two peaks: C-O at 531.8 eV and C=O at 532.9 eV, which may be due to the chemical reaction of oxygen with the terminal acetylene bonds or the adsorption of oxygen on the surface of GDY<sup>[13]</sup>. Fig. S1D shows two peaks at 84.1 and 87.9 eV are attributed to 4f<sub>7/2</sub> and 4f<sub>5/2</sub>, respectively. The results above confirm the successful synthesis of GDYO QDs and Au/GDY.

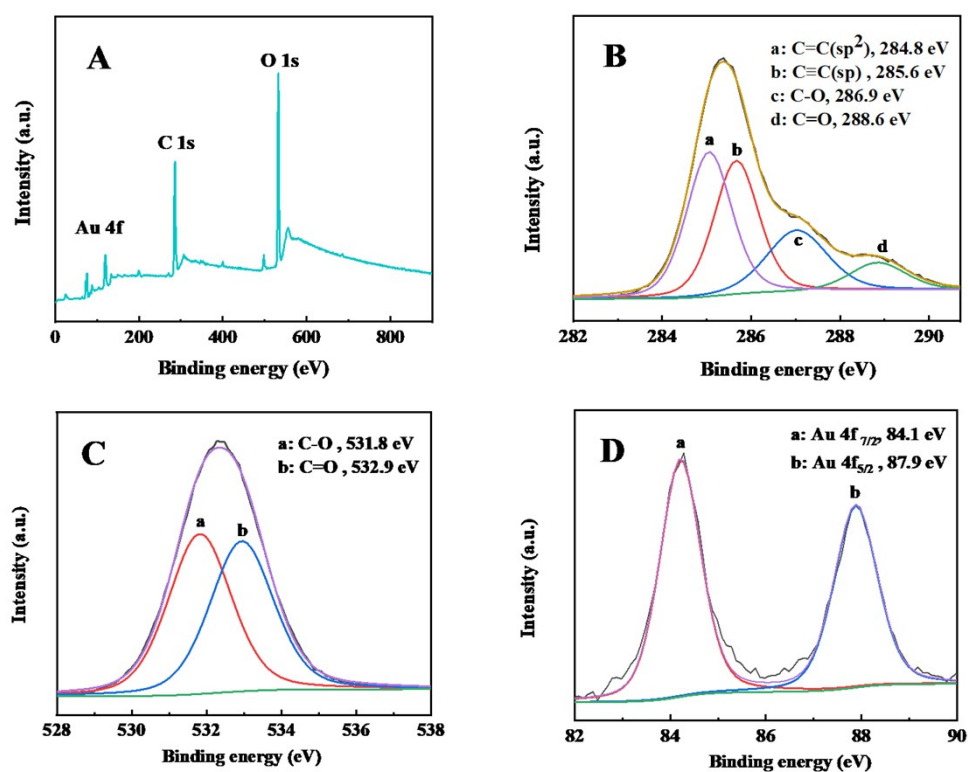

**Fig. S1.** X-ray photoelectron spectroscopy (XPS) analysis of AuNPs/GDY: (A)survey scans, (B) C 1s, (C) O 1s, (D) Au 4f.

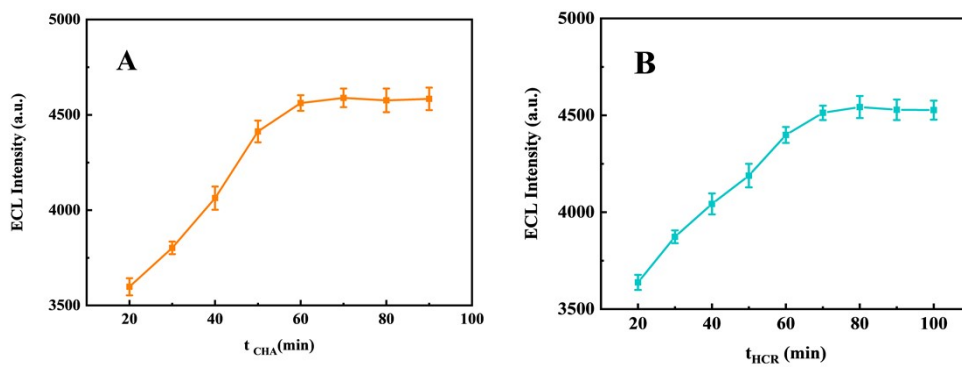

**Fig. S2.** Effects of (C) reaction time in 3D DNA walker and (D) HCR process on the ECL responses. The concentrations of SH-CP, H1/H2, and H3/H4 were 1  $\mu$ M, miRNA-21 was 1 nM. Error bars: SD, n=3.

**Table S1.** Sequences of the oligonucleotides

| Name                                | Sequences (from 5' to 3')                                                                          |
|-------------------------------------|----------------------------------------------------------------------------------------------------|
| SH-CP                               | 5'-SH-(CH <sub>2</sub> ) <sub>6</sub> -TTT TTT GTC TGA GGT-3'                                      |
| miRNA-21                            | 5'-UAG CUU AUC AGA CUG AUG UUG A-3'                                                                |
| H1                                  | 5'-TCA ACA TCA GTC TGA TAA GCT ACG ACA ACT<br>GTA GAT GTA ACC TCA GAC-3'                           |
| H2                                  | 5'-TAC ATC TAC AGT TGT CGT AGC TTA TCA GAC<br>CGC TGC CAA ACA ACT-3'                               |
| H3                                  | 5'-AGT TGT TTG GCA GCG GAA GTC CGC TGC CAA -3'                                                     |
| H4                                  | 5'-NH <sub>2</sub> -(CH <sub>2</sub> ) <sub>6</sub> -CGC TGC CAA ACA ACT TTG GCA GCG<br>GAC TTC-3' |
| miRNA-141                           | 5'-UAA CAC UGU CUG GUA AAG AUG G-3'                                                                |
| miRNA-155                           | 5'-UUA AUG CUA AUC GUG AUA GGG GU-3'                                                               |
| miRNA-199a                          | 5'-ACA GUA GUC UGC ACA UUG GUU A-3'                                                                |
| single-base mismatch<br>RNA (smRNA) | 5'-UAG CUU AUC AGA AUG AUG UUG A-3'                                                                |
| three-base mismatch<br>RNA (tmRNA)  | 5'-UAG CUU GUC AGA AUG AUG AUG A-3'                                                                |
| Non-complementary (NC)              | 5'-UUG UAC UAC ACA AAA GUA CUG-3'                                                                  |



**Table S2.** Comparison of different sensors for miRNA detection

| Method                                      | Linear range | Detection limit | Reference |
|---------------------------------------------|--------------|-----------------|-----------|
| Phosphorescence                             | 8-80 nM      | 1.60 nM         | [5]       |
| Field effect transistor                     | 1 fM-1 nM    | 1 fM            | [6]       |
| Electrochemistry                            | 10 fM-5 nM   | 2.49 fM         | [7]       |
| Stochastic Collision Electrochemistry (SCE) | 0.001-0.1 nM | 1 pM            | [8]       |
| Electrochemistry                            | 5 fM-2 nM    | 1.5 fM          | [9]       |
| Photoelectrochemistry (PEC)                 | 0.001-100 pM | 0.31 fM         | [10]      |
| Electrochemiluminescence (ECL)              | 0.001-10 nM  | 0.00003 nM      | [11]      |
| Fluorescence                                | 1-50 nM      | 0.5 nM          | [12]      |
| Electrochemiluminescence (ECL)              | 0.1 fM-1 nM  | 0.023 fM        | This work |

**Table S3.** Determination of miRNA-21 in human serum samples ( $n=3$ )

| Sample | Detected (fM) | Added (fM) | Found (fM) | Recovery (%) | RSD (%) |
|--------|---------------|------------|------------|--------------|---------|
| 1      | Not           | 1.00       | 0.9874     | 98.74        | 4.62    |
|        | detected      | 10.00      | 10.03      | 103.0        | 3.79    |
| 2      | Not           | 1.00       | 1.053      | 105.3        | 4.84    |
|        | detected      | 10.00      | 9.77       | 97.70        | 5.12    |
| 3      | Not           | 1.00       | 1.038      | 103.8        | 2.56    |
|        | Detected      | 10.00      | 10.19      | 101.9        | 4.33    |

## References

- 1 H.S. Yin, B. Sun, L.F. Dong, B.C. Li, Y.L. Zhou and S.Y. Ai, A signal “on” photoelectrochemical biosensor for assay of protein kinase activity and its inhibitor based on graphite-like carbon nitride, Phos-tag and alkaline phosphatase, *Biosens. Bioelectron.* 2015,**64**,462-468.
- 2 Y. Luo, F.Y. Kong, C. Li, J.J. Shi, W. Lv and W. Wang, One-pot preparation of reduced graphene oxide-carbon nanotube decorated with Au nanoparticles based on protein for non-enzymatic electrochemical sensing of glucose, *Sensor. Actuator. B Chem.* 2016, **234**,625-632.
- 3 Q. Bai, C.Y. Zhang, L. Li, Z.L. Zhu, L.N. Wang, F.Y. Jiang, M.H. Liu, Z.B. Wang, W. Yu, F.L. Du, Z.G. Yang and N. Su, Subsequent monitoring of ferric ion and ascorbic acid using graphdiyne quantum dots-based optical sensors, *Microchim. Acta.* 2020, **187**,657.
- 4 H.T. Qi, P. Yu, Y.X. Wang, G.C. Han, H.B. Liu, Y.P. Yi, Y.L. Li and L.Q. Mao, Graphdiyne oxides as excellent substrate for electroless deposition of Pd clusters with high catalytic activity, *J. Am. Chem. Soc.* 2015, **137**, 5260-5263.
- 5 J.Z. Lv, Y.M. Miao, and G. Q.Yan, Detection of tumor marker miRNA21 based on phosphorescent resonance energy transfer of Mn-ZnS QDs, *Rsc Adv.* 2017, **7**,41063-41069.
- 6 B.J. Cai, Z.N. Xia, J.Y. Wang, S.H. Wu, and X. Jin, Reduced graphene oxide-based field effect transistor biosensors for high-sensitivity miRNA21 detection, *ACS Appl. Nano. Mater.* 2022, **5**,12035-12044.
- 7 P. Fu, S. Xing, M.J. Xu, Y. Zhao, and C. Zhao, Peptide nucleic acid-based electrochemical biosensor for simultaneous detection of multiple microRNAs from cancer cells with catalytic hairpin assembly amplification , *Sensor. Actuator. B Chem.* 2020, **305**,127545.

- 8 X. Qiu, H.R. Tang, J.Y. Dong, C.H. Wang and Y.X. Li, Stochastic collision electrochemistry from single Pt nanoparticles: electrocatalytic amplification and microRNA sensing, *Anal. Chem.* 2022, **94**,8202-8208.
- 9 Z.P. Shen, L.Y. He, W.H. Wang, L. Tan and N. Gan, Highly sensitive and simultaneous detection of microRNAs in serum using stir-bar assisted magnetic DNA nanospheres encoded probes, *Biosens. Bioelectron.* 2020, **148**,111831.
- 10 N. Hao, J.W. Lu, M.J. Chi, M. Xiong, Y. Zhang, R. Hua and K. Wang, A universal photoelectrochemical biosensor for dual microRNA detection based on two CdTe nanocomposites, *J. Mater. Chem. B.* 2019, **7**,1133.
- 11 W.Q. Bai, A.P. Cui, M.Z. Liu, X.Z. Qiao, Y. Li and T. Wang, Signal-off electrogenerated chemiluminescence biosensing platform based on the quenching effect between ferrocene and Ru(bpy)<sub>3</sub><sup>2+</sup>-functionalized metal-organic frameworks for the detection of methylated RNA, *Anal. Chem.* 2019, **91**,11840-11847.
- 12 H. Wang, K.Q. Deng, J. Xiao, C.X. Li, S.W. Zhang and X.F. Li, A sandwich-type photoelectrochemical sensor based on tremella-like graphdiyne as photoelectrochemical platform and graphdiyne oxide nanosheets as signal inhibitor, *Sensor. Actuator. B Chem.* 2020, **304**, 127363.
